# Supplementary material for: High Stress Levels and Trust toward the Government Are Associated with More Positive Attitudes toward COVID-19 Vaccines among French Students: A Pilot Study
Source: MDPI journal article supplement (doi:10.3390/vaccines10091377), 2022-08-24
Supplement: s1 [file s1]

---

## Supplementary Section S1—Self-Reported Questionnaires

### *Pandemic related stressors*

Instructions: We're going to ask you a few things that can be stressful during Lockdown. Again, there is no right or wrong answer, we are only interested in your sincere answer. Participants had to answer on a scale from 1 (Strongly Agrees) to 7 (Strongly Disagrees)

1. My daily income
2. Being able to do my job well enough
3. Future employment prospects
4. Access to basic necessities such as food

### Factor 1

### Factor In review

5. Not being able to participate in group social activities
6. Dealing with the behavior of adults with whom I isolate myself
7. Dealing with the behavior of children with whom I isolate myself
8. The national economy
9. The risk that I or others I know will catch COVID-19
10. The risk of myself or others I know being hospitalized or dying because of COVID-19
11. Adapting your work to digital platforms
12. Having to adapt one's social life to digital platforms
13. Being ashamed to act differently from others (e.g. at work, shopping)

### Living conditions

Instructions: Indicate what best describes your current situation

- If you are locked down, how many other adults live together in the same place as you?

- How many people live in the city where you live?
- What is the size of the place where you live during Lockdown (in m<sup>2</sup>)?
- Does your living location have an exterior?

o Yes

o No

- If yes, do you have access to a:

o Balcony

o Garden

o Inner courtyard

If you are locked down, how many children under the age of 12 live together in the

same place as you?

- Do you know of anyone infected with Covid-19?

o Yes

o No

• Do you know anyone who's been hospitalized because of Covid-19?

o Yes

o No

• Do you know people who died because of Covid-19?

o Yes

o No

*Belief in a dangerous world scale*

Instructions : For each of the following statements, please indicate how much you agree with the statement : 1 = Strongly disagree, 2 = Disagree, 3 = Neither agree nor disagree, 4 = Agree, 5 = Strongly agree

• It seems that every year there are fewer and fewer truly respectable people, and more and

more persons with no morals at all who threaten everyone else.

• Although it may appear that things are constantly getting more dangerous and chaotic, it

really is not so. Every era has its problems, and a person's chances of living a safe,

untroubled life are better today than ever before.

• If our society keeps degenerating the way it has been lately, it's liable to collapse like a

rotten log and everything will be in chaos.

• Our society is not full of immoral and degenerate people who prey on decent people. News

reports of such cases are grossly exaggerating and misleading.

• The "end" is not near. People who think that earthquakes, wars and famines mean God

might be about to destroy the world are being foolish.

• There are many dangerous people in our society who will attack someone out of pure

meanness, for no reason at all.

• Despite what one hears about "crime in the street," there probably is not any more now than

there ever has been.

• Any day now, chaos and anarchy could erupt around us. All the signs are pointing to it.

• If a person takes a few sensible precautions, nothing bad will happen to him. We do not live

in a dangerous world.

• Every day, as our society becomes more lawless, a person's chances of being robbed,

assaulted, and even murdered go up and up.

- Things are getting so bad, even a decent law-abiding person who takes sensible precautions can still become a victim of violence and crime.
- Our country is not falling apart or rotting from within.

*Perceived Vulnerability to Disease scale*

Instructions : For each of the following statements, please indicate how much you agree with the statement : 1 = Strongly disagree, 2 = Somewhat disagree, 3 = Slightly disagree, 4 = Neutral, 5 = Slightly agree, 6 = Somewhat agree, 7 = Strongly agree

- It really bothers me when people sneeze without covering their mouths.
- If an illness is ‘going around’, I will get it.
- I am comfortable sharing a water bottle with a friend.
- I do not like to write with a pencil someone else has obviously chewed on.
- My past experiences make me believe I am not likely to get sick even when my friends are sick.
- I have a history of susceptibility to infectious disease.
- I prefer to wash my hands pretty soon after shaking someone’s hand.
- In general, I am very susceptible to colds, flu and other infectious diseases.
- I dislike wearing used clothes because you do not know what the last person who wore it was like.
- I am more likely than the people around me to catch an infectious disease.
- My hands do not feel dirty after touching money.
- I am unlikely to catch a cold, flu or other illness, even if it is ‘going around’.
- It does not make me anxious to be around sick people.
- My immune system protects me from most illnesses that other people get.
- I avoid using public telephones because of the risk that I may catch something from the previous user.

**Supplementary Section S2—Sample Descriptive statistics**

|                | Overall (N=133) |
|----------------|-----------------|
| <b>Age</b>     |                 |
| Mean (SD)      | 18.8 (1.8)      |
| Range          | 13.0 - 29.0     |
| <b>Gender-</b> |                 |
| Female         | 117 (88.0%)     |
| Male           | 15 (11.3%)      |

|                                          | Overall (N=133)     |
|------------------------------------------|---------------------|
| Other                                    | 1 (0.8%)            |
| <b>Year of study</b>                     |                     |
| 1st year                                 | 130 (97.7%)         |
| 2nd year                                 | 1 (0.8%)            |
| 3rd year                                 | 1 (0.8%)            |
| 5th year                                 | 1 (0.8%)            |
| <b>Job</b>                               |                     |
| Yes                                      | 25 (18.8%)          |
| No                                       | 108 (81.2%)         |
| <b>Scholarship</b>                       |                     |
| Yes                                      | 53 (39.8%)          |
| No                                       | 80 (60.2%)          |
| <b>Type of Housing</b>                   |                     |
| Personal Housing                         | 8 (6.0%)            |
| Roommate                                 | 4 (3.0%)            |
| Student Residence                        | 1 (0.8%)            |
| Parent's house                           | 120 (90.2%)         |
| <b>Inner Courtyard (2)</b>               |                     |
| Yes                                      | 24 (18.0%)          |
| No                                       | 109 (82.0%)         |
| <b>Balcony (2)</b>                       |                     |
| Yes                                      | 56 (42.1%)          |
| No                                       | 77 (57.9%)          |
| <b>Garden (2)</b>                        |                     |
| Yes                                      | 66 (49.6%)          |
| No                                       | 67 (50.4%)          |
| <b>Housing Area</b>                      |                     |
| Mean (SD)                                | 207.7 (1259.3)      |
| Range                                    | 17.2 - 14600.0      |
| <b>City Population</b>                   |                     |
| Mean (SD)                                | 187208.1 (536894.8) |
| Range                                    | 212.0 - 2148000.0   |
| <b>How many adults do you live with?</b> |                     |
| Mean (SD)                                | 2.2 (0.9)           |
| Range                                    | 1.0 - 5.0           |

|                                                                     | Overall (N=133) |
|---------------------------------------------------------------------|-----------------|
| <b>How many children do you live with?</b>                          |                 |
| Mean (SD)                                                           | 0.3 (0.7)       |
| Range                                                               | 0.0 - 3.0       |
| <b>Living Conditions</b>                                            |                 |
| Mean (SD)                                                           | 72.3 (251.0)    |
| Range                                                               | 10.7 - 2925.0   |
| <b>COVID-19 Burden</b>                                              |                 |
| Mean (SD)                                                           | 4.9 (0.9)       |
| Range                                                               | 3.0 - 6.0       |
| <b>Pandemic-Related Stressors</b>                                   |                 |
| Mean (SD)                                                           | 20.8 (0.8)      |
| Range                                                               | 19.1 - 23.2     |
| <b>Perceived Stress Scale (PSS)</b>                                 |                 |
| Mean (SD)                                                           | 59.2 (17.9)     |
| Range                                                               | 18.6 - 99.5     |
| <b>Perceived Vulnerability to Diseases (PVD)</b>                    |                 |
| Mean (SD)                                                           | 4.0 (0.8)       |
| Range                                                               | 1.9 - 5.9       |
| <b>Belief in a Dangerous World Scale (BDW)</b>                      |                 |
| Mean (SD)                                                           | 3.2 (0.6)       |
| Range                                                               | 1.8 - 4.8       |
| <b>Trust in government management of the SARS-CoV-2 pandemic</b>    |                 |
| Mean (SD)                                                           | 32.1 (22.8)     |
| Range                                                               | 0.0 - 92.0      |
| <b>Trust in government data relative to the SARS-CoV-2 pandemic</b> |                 |
| Mean (SD)                                                           | 38.2 (26.6)     |
| Range                                                               | 0.0 - 95.0      |
| <b>Trust in government regarding vaccine safety</b>                 |                 |
| Mean (SD)                                                           | 32.8 (26.6)     |
| Range                                                               | 0.0 - 100.0     |
| <b>Trust in government regarding vaccine efficacy</b>               |                 |
| Mean (SD)                                                           | 32.8 (26.0)     |
| Range                                                               | 0.0 - 100.0     |
| <b>Attitude toward SARS-CoV-2 Vaccine</b>                           |                 |
| Mean (SD)                                                           | 32.0 (24.2)     |

|       | Overall (N=133) |
|-------|-----------------|
| Range | 0.0 - 92.4      |

---

*Note. Mean (standard deviation) and minimum and maximum value for each socio-demographic, cognitive and environmental variable and outcomes used in the analyses.*
